# Supplementary material for: Sweeping lymph node micrometastases off their feet: an engineered model to evaluate natural killer cell mediated therapeutic intervention of circulating tumor cells that disseminate to the lymph nodes
Source: Royal Society of Chemistry journal article supplement (doi:10.1039/c3lc50584g), 2013-07-25

**Supplementary Figure 1:**

Top view and side view of microbubble (MB) arrays formed from 100  $\mu\text{m}$  circular openings at different magnifications. Scale bar = 100  $\mu\text{m}$ .

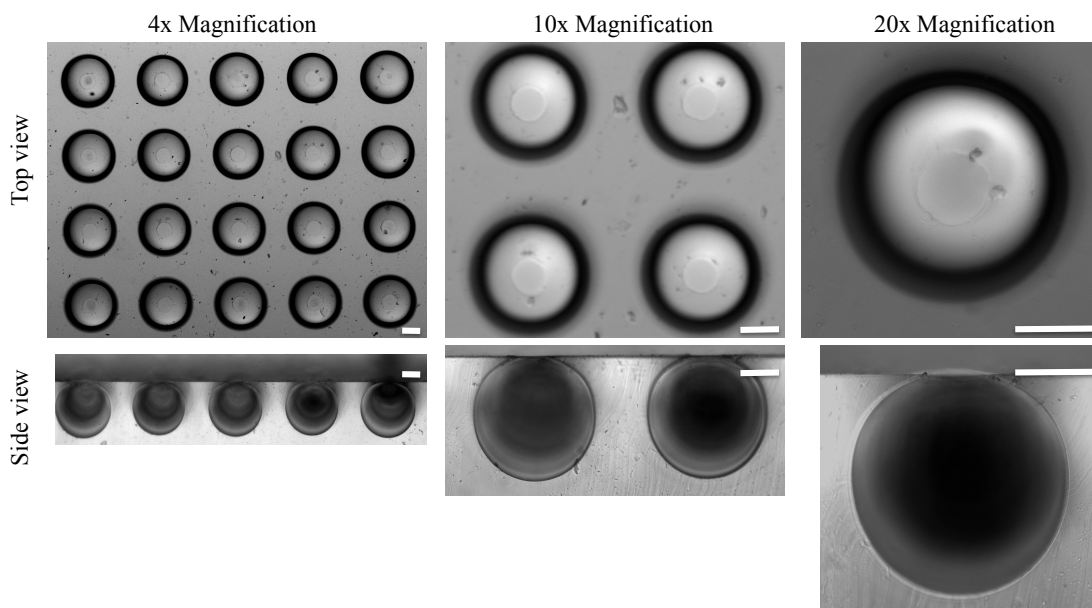

**Supplementary Figure 2:**

(A.) NK cells in culture 24 hours after isolation (B.) Expression of CD57 by NK cells  
(C.) Bright field image of NK cells conjugated to TRAIL functionalized liposomes (D.)  
Fluorescent field image of NK cells stained with Calcein-AM (Live cell marker) 24 hours  
after conjugation indicates that TRAIL functionalized liposomes did not have any  
detrimental effects on NK cells.

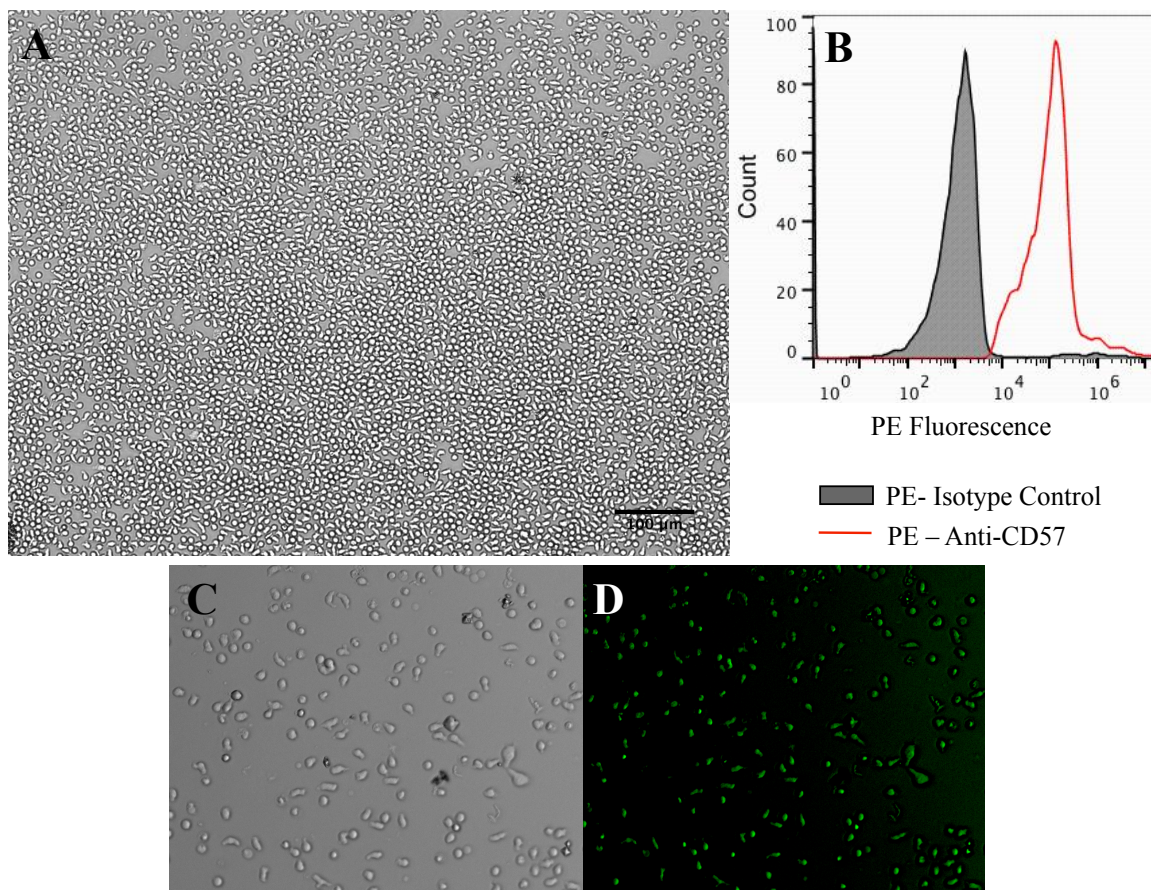

**Supplementary Figure 3:**

Confocal micrographs of (A.) LNCaP cells, (B.) super NK cells and (C.) LNCaP (Red) and super NK cells (Green) cells seeded in a single MB. Scale bar = 100  $\mu\text{m}$

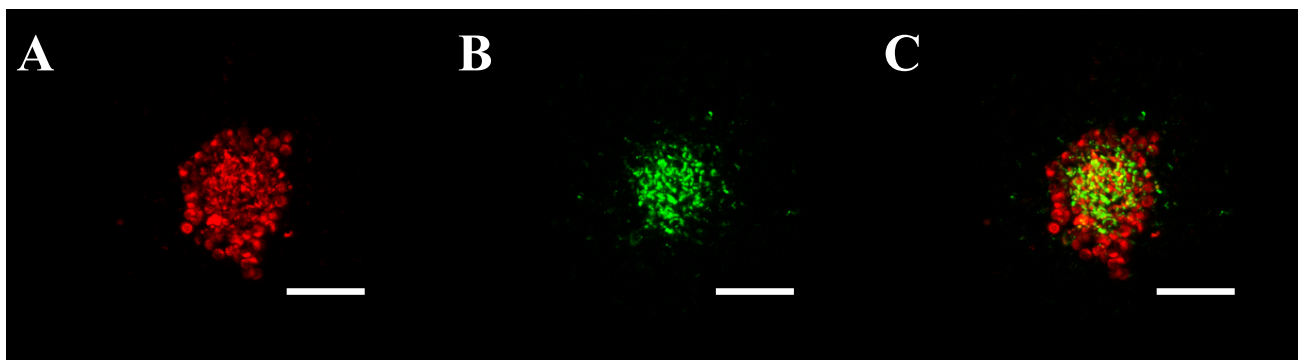

#### Supplementary Figure 4:

Flow cytometry histograms indicating the expression of death receptors in the cancer cell lines used in this study. The shift in fluorescent intensity indicates the amount of expression of DR4 (red) and DR5 (blue) on the surface of cancer cells.

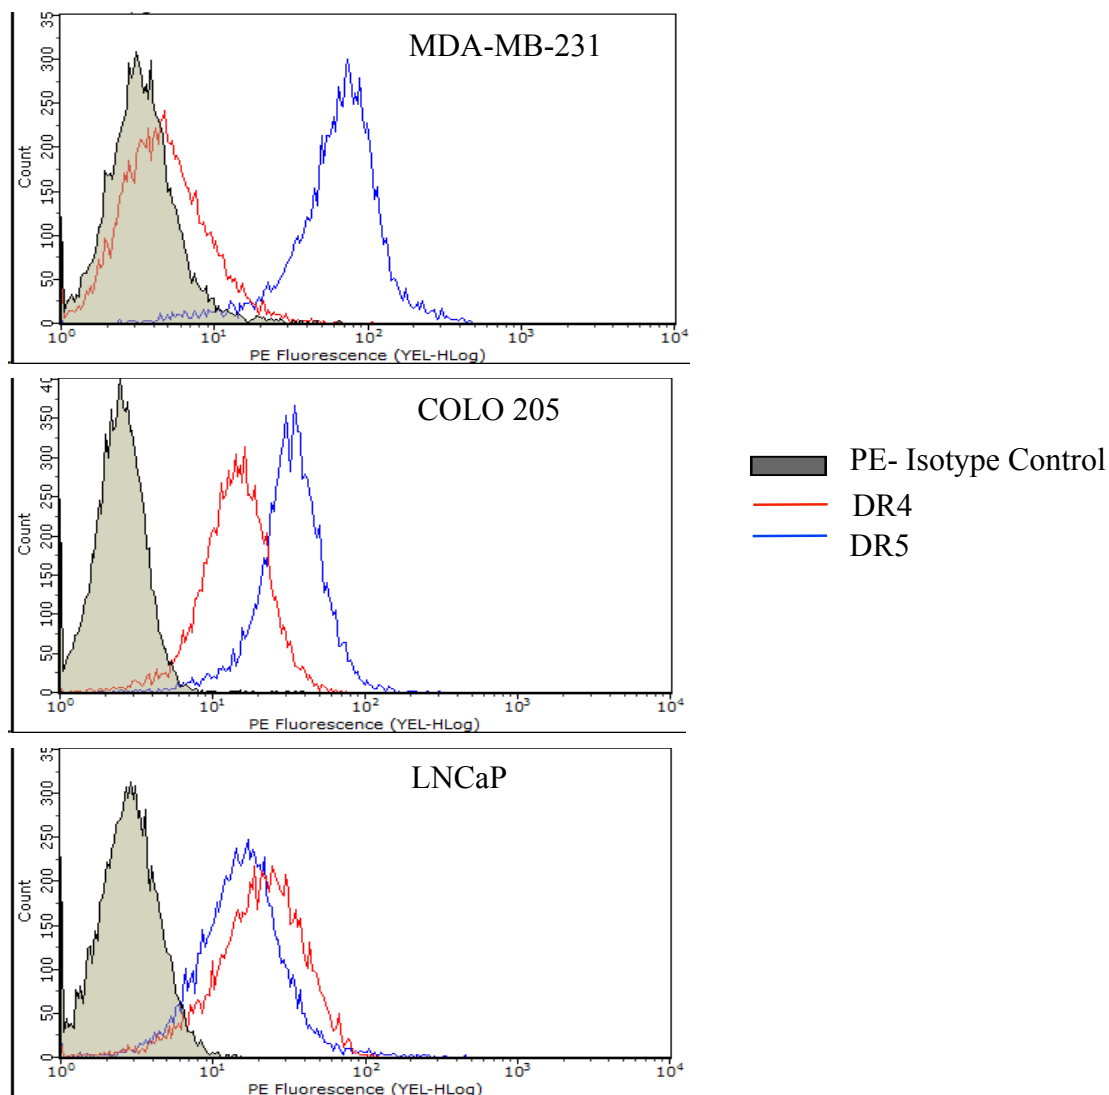





**Supplementary Figure 6:**

Bright field and fluorescent images of MB stained with PI after 24 hours in culture. MB that were incubated with liposome buffer, naked liposomes, TRAIL functionalized liposomes, NK cells or super NK cells prior to seeding cancer cells (COLO 205, LNCaP).

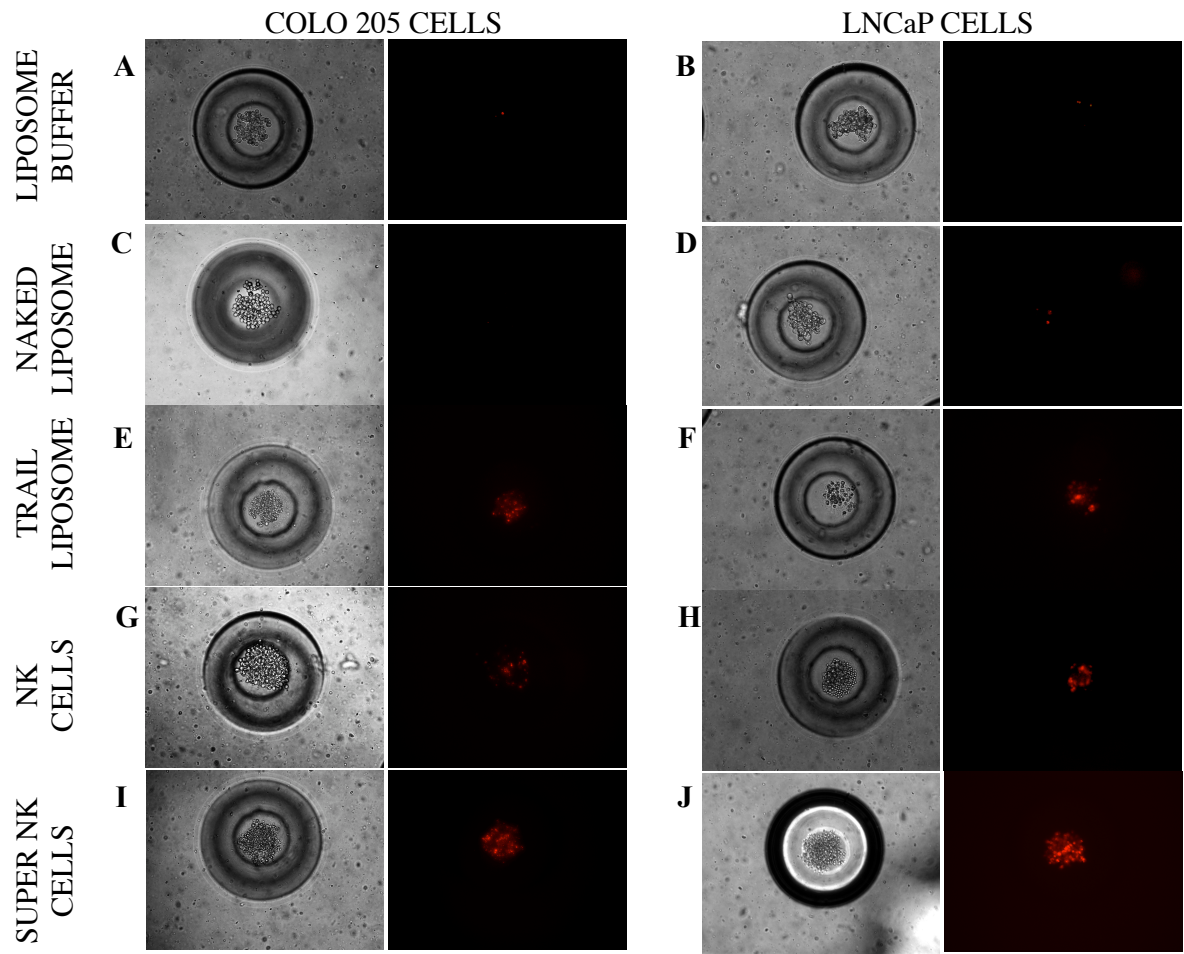

Supplement: c3lc50584g.pdf [file c3lc50584g.pdf]
